# Supplementary material for: GWAS for Early-Establishment QTLs and Their Linkage to Major Phenology-Affecting Genes (Vrn, Ppd, and Eps) in Bread Wheat
Source: MDPI journal article supplement (doi:10.3390/genes14071507), 2023-07-24
Supplement: s1 [file s1]

**Supplementary Table 1:** List of *QTLs* controlling multiple traits in different planting times

| <i>QTLs</i>    | Chr | Total <i>QTL</i> Interval | Traits                                | Most Significant Marker(s)                                                                                                                                                                                                                                                                                                                                                                                                                                                    |
|----------------|-----|---------------------------|---------------------------------------|-------------------------------------------------------------------------------------------------------------------------------------------------------------------------------------------------------------------------------------------------------------------------------------------------------------------------------------------------------------------------------------------------------------------------------------------------------------------------------|
| QMpt.bisa.1B.3 | 1B  | 0.52                      | TGW, PG_BTH                           | 1B_572013120, 1B_572077620                                                                                                                                                                                                                                                                                                                                                                                                                                                    |
| QMpt.bisa.1D.2 | 1D  | 0.11                      | PG_GFD, FLGLFW                        | 1D_30541993, 1D_30542016                                                                                                                                                                                                                                                                                                                                                                                                                                                      |
| QMpt.bisa.1D.3 | 1D  | 0.59                      | PG_GFD, PG_BTH                        | 1D_31127895                                                                                                                                                                                                                                                                                                                                                                                                                                                                   |
| QMpt.bisa.2A.1 | 2A  | 1.27                      | SR, FLGLFL                            | 2A_31950515, 2A_32942025, 2A_33177689                                                                                                                                                                                                                                                                                                                                                                                                                                         |
| QMpt.bisa.2A.3 | 2A  | 315.42                    | PG_GFD, FLGLFW, SR, TGW, PG_DTB, HUS  | 2A_154952478, 2A_186427483, 2A_188487886, 2A_202884383, 2A_218333140, 2A_220203137, 2A_223189397, 2A_232886081, 2A_233356485, 2A_234393958, 2A_235357606, 2A_236151345, 2A_237924432, 2A_265043237, 2A_269930695, 2A_274288787, 2A_276745579, 2A_285841892, 2A_308438332, 2A_310110750, 2A_310348491, 2A_312397332, 2A_315761862, 2A_318828556, 2A_319326184, 2A_320703902, 2A_330767318, 2A_364159450, 2A_370794256, 2A_381365384, 2A_413685276, 2A_415317868, 2A_416350269, |
| QMpt.bisa.2A.6 | 2A  | 0.82                      | PG_GFD, FLGLFL                        | 2A_754163560, 2A_754601516                                                                                                                                                                                                                                                                                                                                                                                                                                                    |
| QMpt.bisa.2B.2 | 2B  | 0.49                      | SR, PG_DTB, PG_BTH                    | 2B_59220162, 2B_59220243, 2B_59584538                                                                                                                                                                                                                                                                                                                                                                                                                                         |
| QMpt.bisa.2D.3 | 2D  | 94.10                     | EGC, PG_GFD, PG_BTH, FLGLFW           | 2D_141998244, 2D_224333851, 2D_226305009, 2D_259407805, 2D_325652495, 2D_336112223, 2D_372937863                                                                                                                                                                                                                                                                                                                                                                              |
| QMpt.bisa.3A.4 | 3A  | 39.54                     | EGC, GRYLD                            | 3A_525879700, 3A_533589765, 3A_557212913, 3A_560829823, 3A_561026957, 3A_561851147                                                                                                                                                                                                                                                                                                                                                                                            |
| QMpt.bisa.3A.5 | 3A  | 4.74                      | PG_BTH, PG_GFD                        | 3A_653959431, 3A_654785037                                                                                                                                                                                                                                                                                                                                                                                                                                                    |
| QMpt.bisa.3B.2 | 3B  | 34.99                     | PG_DTB, CTIR                          | 3B_420519725, 3B_453434148                                                                                                                                                                                                                                                                                                                                                                                                                                                    |
| QMpt.bisa.4B.2 | 4B  | 7.78                      | PG_DTB, TGW                           | 4B_496823471, 4B_498390062, 4B_504307823                                                                                                                                                                                                                                                                                                                                                                                                                                      |
| QMpt.bisa.4B.6 | 4B  | 0.28                      | PG_DTB, SR                            | 4B_656452095                                                                                                                                                                                                                                                                                                                                                                                                                                                                  |
| QMpt.bisa.5A.1 | 5A  | 16.83                     | PG_DTB, PG_GFD                        | 5A_67475215, 5A_70136376                                                                                                                                                                                                                                                                                                                                                                                                                                                      |
| QMpt.bisa.5A.3 | 5A  | 3.62                      | EGC, LFGLFL, HUS, PG_BTH, PG_GFD, TGW | 5A_579216178, 5A_579315291, 5A_579849967, 5A_580467995, 5A_581738768, 5A_581738776                                                                                                                                                                                                                                                                                                                                                                                            |
| QMpt.bisa.5B.1 | 5B  | 29.85                     | PG_BTH, FLGLFL, SR                    | 5B_396108086, 5B_397181195, 5B_397682314, 5B_400100474, 5B_400454479, 5B_410694082, 5B_415524761, 5B_421473320, 5B_421719134                                                                                                                                                                                                                                                                                                                                                  |

| <b>QTLs</b>    | <b>Chr</b> | <b>Total QTL Interval</b> | <b>Traits</b>                                 | <b>Most Significant Marker(s)</b>                                                                                                                                                                                                                                                                                                                                                                                                                              |
|----------------|------------|---------------------------|-----------------------------------------------|----------------------------------------------------------------------------------------------------------------------------------------------------------------------------------------------------------------------------------------------------------------------------------------------------------------------------------------------------------------------------------------------------------------------------------------------------------------|
| QMpt.bisa.5B.2 | 5B         | 20.30                     | PG_DTB, PG_BTH, PG_GFD, FLGLFL                | 5B_552860736, 5B_554810601, 5B_557927509, 5B_561282306, 5B_562371212, 5B_565985738, 5B_566674836, 5B_567647671, 5B_568515593, 5B_568678349, 5B_569083742, 5B_569889755, 5B_570824048, 5B_571199142, 5B_571213548                                                                                                                                                                                                                                               |
| QMpt.bisa.5B.3 | 5B         | 0.10                      | PG_DTB, SR                                    | 5B_576445730, 5B_576445786                                                                                                                                                                                                                                                                                                                                                                                                                                     |
| QMpt.bisa.5B.4 | 5B         | 0.436909                  | PG_DTB, SR, GRYLD                             | 5B_582834253, 5B_582974222, 5B_589459465, 5B_589896374                                                                                                                                                                                                                                                                                                                                                                                                         |
| QMpt.bisa.5B.5 | 5B         | 6.19                      | PG_DTB, SR                                    | 5B_591184260, 5B_591830635, 5B_592792409, 5B_593016847, 5B_593137406, 5B_594155067, 5B_594614262, 5B_594913947, 5B_595649946, 5B_596648484                                                                                                                                                                                                                                                                                                                     |
| QMpt.bisa.5D.1 | 5D         | 0.97                      | PG_DTB, FLGLFL, SR                            | 5D_544153906, 5D_544217347, 5D_544799149                                                                                                                                                                                                                                                                                                                                                                                                                       |
| QMpt.bisa.6A.1 | 6A         | 4.77                      | PG_GFD, HUS                                   | 6A_61080142, 6A_61212031, 6A_61215999, 6A_61400594, 6A_61422653, 6A_61817777, 6A_62571452, 6A_63109075, 6A_63193128, 6A_63205035, 6A_65844428                                                                                                                                                                                                                                                                                                                  |
| QMpt.bisa.6A.3 | 6A         | 387.25                    | PG_DTB, PG_GFD, HUS, FLGLFL, FLGLFW, CTIR, SR | 6A_107243402, 6A_109489944, 6A_110621637, 6A_111503215, 6A_112907140, 6A_113174486, 6A_114457003, 6A_187733247, 6A_208514838, 6A_209963947, 6A_215325817, 6A_232059246, 6A_232059265, 6A_272380641, 6A_312709201, 6A_327439351, 6A_333494073, 6A_353882239, 6A_368885626, 6A_378567041, 6A_395513261, 6A_414252855, 6A_420669060, 6A_427422144, 6A_430583146, 6A_439553873, 6A_451070801, 6A_493731895                                                         |
| QMpt.bisa.6A.5 | 6A         | 0.000027                  | GRYLD, FLGLFL                                 | 6A_609057074                                                                                                                                                                                                                                                                                                                                                                                                                                                   |
| QMpt.bisa.6B.2 | 6B         | 489.57                    | PG_BTH, PG_GFD, TGW, FLGLFL, HUS, CTIR, GRYLD | 6B_154004312, 6B_169795390, 6B_193075087, 6B_207880142, 6B_208115717, 6B_211211877, 6B_213003566, 6B_299348988, 6B_303643410, 6B_356925185, 6B_363538527, 6B_363772854, 6B_383909822, 6B_384505441, 6B_413515478, 6B_447927068, 6B_451403111, 6B_451403123, 6B_455175520, 6B_458132601, 6B_459114835, 6B_471674109, 6B_476732821, 6B_563977112, 6B_587174528, 6B_592698766, 6B_595952036, 6B_596935914, 6B_604804854, 6B_623993849, 6B_624022505, 6B_640984096 |

| <b>QTLs</b>    | <b>Chr</b> | <b>Total<br/>QTL<br/>Interval</b> | <b>Traits</b>                         | <b>Most Significant Marker(s)</b>                                                                                                                                                                                                                                                                   |
|----------------|------------|-----------------------------------|---------------------------------------|-----------------------------------------------------------------------------------------------------------------------------------------------------------------------------------------------------------------------------------------------------------------------------------------------------|
| QMpt.bisa.6D.2 | 6D         | 6.93                              | EGC, FLGLFL                           | 6D_5945276, 6D_6343707,<br>6D_7993836, 6D_12018637                                                                                                                                                                                                                                                  |
| QMpt.bisa.6D.3 | 6D         | 55.86                             | EGC, FLGLFL                           | 6D_178681816, 6D_229305823                                                                                                                                                                                                                                                                          |
| QMpt.bisa.7A.6 | 7A         | 225.55                            | PG-BTH, HUS, FLGFLF,<br>CTIR, SR, TGW | 7A_246722996, 7A_272835142,<br>7A_274007853, 7A_274990066,<br>7A_281995484, 7A_305699834,<br>7A_367700921, 7A_375024289,<br>7A_382005083, 7A_385044692,<br>7A_423788356, 7A_429976050,<br>7A_432535332, 7A_435236652,<br>7A_436695555, 7A_438167392,<br>7A_454649603, 7A_459209377,<br>7A_471725086 |
| QMpt.bisa.7B.3 | 7B         | 235.86                            | PG_DTB, EGC, CTIR, SR                 | 7B_113442605, 7B_117141590,<br>7B_177787916, 7B_337375747                                                                                                                                                                                                                                           |
| QMpt.bisa.7B.5 | 7B         | 1.70                              | PG_GFD, HUS, EGC                      | 7B_669973991, 7B_670542596,<br>7B_671427054                                                                                                                                                                                                                                                         |
| QMpt.bisa.7D.2 | 7D         | 3.19                              | PG_DTB, PG_GFD,<br>FLGLFL, SR, TGW    | 7D_55486522, 7D_55529933,<br>7D_55920290, 7D_56296098,<br>7D_57246447, 7D_57775472,<br>7D_57903956, 7D_58046109,<br>7D_58206696, 7D_58486999,<br>7D_58493344, 7D_58500973,<br>7D_58633321                                                                                                           |
| QMpt.bisa.7A.4 | 7A         | 6.23                              | GRYLD, PG_DTB                         | 7A_68211963, 7A_68774152,<br>7A_69311409, 7A_69937982,<br>7A_70208197, 7A_70893713,<br>7A_71591808, 7A_69311409,<br>7A_70893713                                                                                                                                                                     |

**Supplementary Table 2:** The utilisation of a detailed designation or appellation results in a clear and unequivocal communication of the subject matter. Multiple codes are employed in the research to enhance readability for the audience. The codes utilised in the study have been expounded upon in detail in the subsequent table.

| Abbreviations | Full form                                                      |
|---------------|----------------------------------------------------------------|
| ↑             | Positive Selection Gain                                        |
| ↓             | Negative Selection Gain                                        |
| AD            | Average Deviation                                              |
| APSIM         | The Agricultural Production Systems sIMulator                  |
| BISA          | Borlaug Institute for South Asia                               |
| BLUP          | Best Linear Unbiased Prediction                                |
| bp            | Base pair                                                      |
| CENEB         | Campo Experimental Norman E. Borlaug                           |
| CI            | Confidnece Interval of mean                                    |
| CIMMYT        | International Maize and Wheat Improvement Centre               |
| cM            | Centimorgan                                                    |
| CTIR          | Canopy Temperature Increasing Rate                             |
| DAYSMT        | Days to Maturity                                               |
| DNA           | Deoxy ribonucleic acid                                         |
| DTB           | Days to Booting                                                |
| DTHD          | Days to Heading                                                |
| EGC           | Early Ground Cover                                             |
| EP            | Early Planting                                                 |
| Eps           | earliness per se gene                                          |
| FA            | Factor analysis                                                |
| fD            | Photoperiod factor                                             |
| FLGLFA        | Flag Leaf Area                                                 |
| FLGLFL        | Flag Leaf Length                                               |
| g             | Gram                                                           |
| GBS           | Genotyping by Sequencing                                       |
| GDD           | Growing Degree Days                                            |
| GFD           | Grain Filling Duration                                         |
| GRYLD         | Grain Yield                                                    |
| GWAS          | Genome Wide Association Studies                                |
| HUS           | Height Upto Spike                                              |
| IGP           | Indo -Gangetic plain                                           |
| IRT           | Infrared Thermometer                                           |
| IWGSC         | International Wheat Genome Sequencing Consortium               |
| LAI           | Leaf Area Index                                                |
| LD            | Iinkage Disequilibrium                                         |
| LR            | Leaf Rust                                                      |
| LRTg          | Likelihood ratio for genotypes ()                              |
| LRTge         | Likelihood ratio for genotype and planting time interaction () |
| MAS           | Marker Assisted Selection                                      |
| Mbp           | Mega base pair                                                 |

| <b>Abbreviations</b> | <b>Full form</b>                                      |
|----------------------|-------------------------------------------------------|
| ME                   | Mega-environment                                      |
| MET                  | Multi-environmental                                   |
| mg                   | Milligram                                             |
| MGIDI                | Multi-trait Genotype-Idiotypic Distance Index         |
| ml                   | Milliliter                                            |
| mm                   | Millimeter                                            |
| MPE                  | Mean Performance and Stability                        |
| MR                   | Moderately Resistant                                  |
| MS                   | Moderately Susceptible                                |
| NAM                  | Nested Connection Mapping                             |
| NARS                 | National Agricultural Research System                 |
| NDVI                 | Normalized Difference Vegetation Index                |
| NGS                  | Next-generation Sequencing                            |
| NIC-GoI              | National Informatics Centre-Government of India       |
| nm                   | Nanometer                                             |
| NPK                  | Nitrogen:Phosphorus:Potassium                         |
| °C                   | Degree Celsius                                        |
| PG_BTH               | Photo-Growing Degree Days for Height Upto Spike       |
| PG_DAYSMT            | Photo-Growing Degree Days for Days to Maturity        |
| PG_DTB               | Photo-Growing Degree Days for Days to Booting         |
| PG_DTHD              | Photo-Growing Degree Days for Days to Heading         |
| PG_GFD               | Photo-Growing Degree Days for Grain Filling Duration  |
| PGDD                 | Photo-Growing Degree Days                             |
| PH                   | Plant Height                                          |
| Ppd                  | Photoperiod sensitivity gene                          |
| QTL                  | Quantitative Trait Loci                               |
| R                    | Resistant                                             |
| REML                 | Restricted Residual Maximum Likelihood                |
| S                    | Susceptible                                           |
| S1                   | Season 1                                              |
| S2                   | Season 2                                              |
| S3                   | Season 3                                              |
| SAARC                | South Asian Association for Regional Cooperation      |
| SABWGPYT             | South Asia Bread Wheat Genomic Prediction Yield Trial |
| SI                   | Selection Intensity                                   |
| SNP                  | Single Nucleotide Polymorphism                        |
| SpkLng               | Spike Length                                          |
| SR                   | Stem Rust                                             |
| SR                   | Senescence Rate                                       |
| SSR                  | Simple Sequence Repeat                                |
| TGW                  | Thousand Grain Weight                                 |
| Tmax                 | Maximum Temperature                                   |
| Tmin                 | Minimum Temperature                                   |

| <b>Abbreviations</b> | <b>Full form</b>                              |
|----------------------|-----------------------------------------------|
| Topt                 | Optimum Temperature                           |
| TP                   | Timely Planting                               |
| Vrn                  | Vernalization gene                            |
| WEDD                 | Degree Days Estimated by Wang and Engel, 1998 |
| YR                   | Yellow Rust                                   |

**Supplementary Figure 1: Weather parameter for three seasons at BISA farm, Ludhiana**

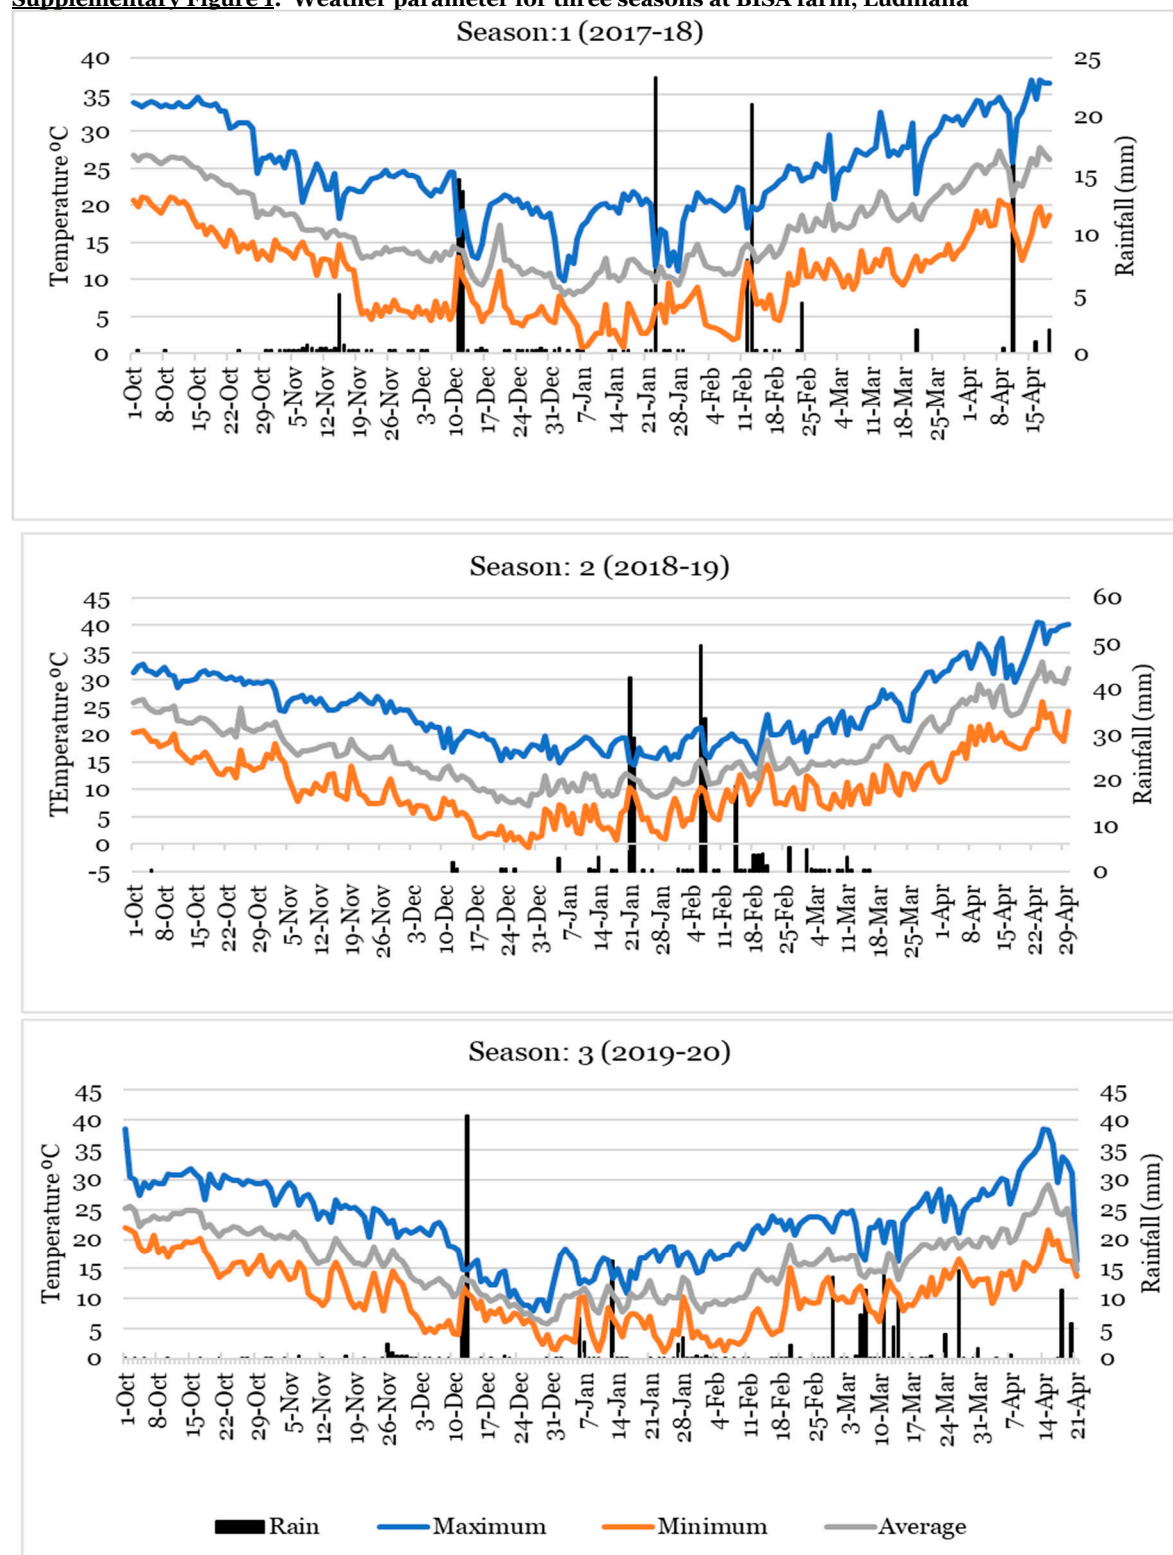

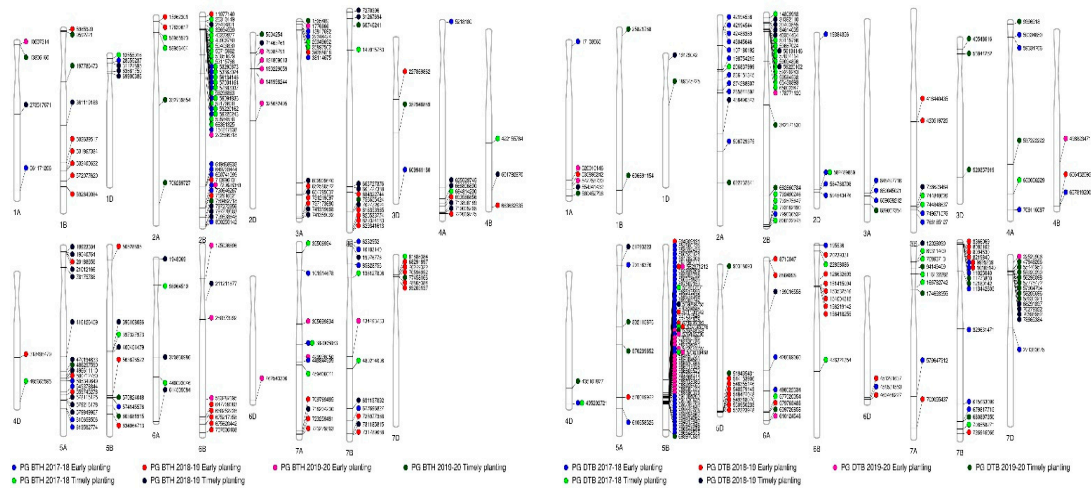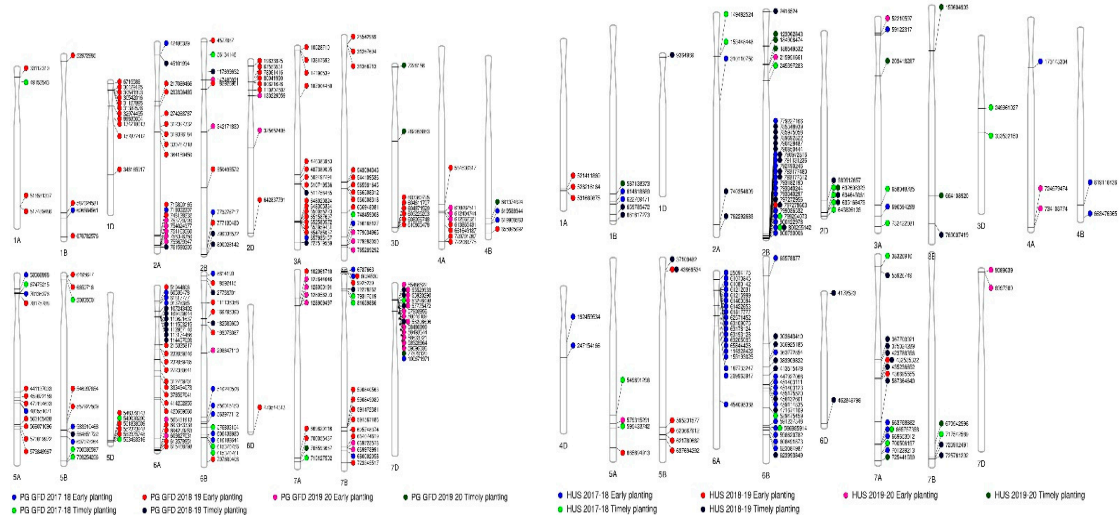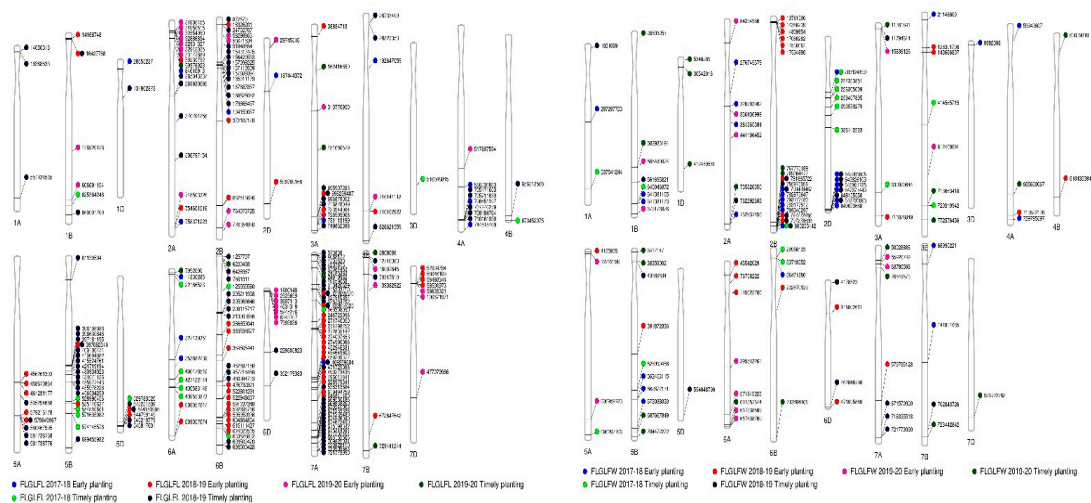



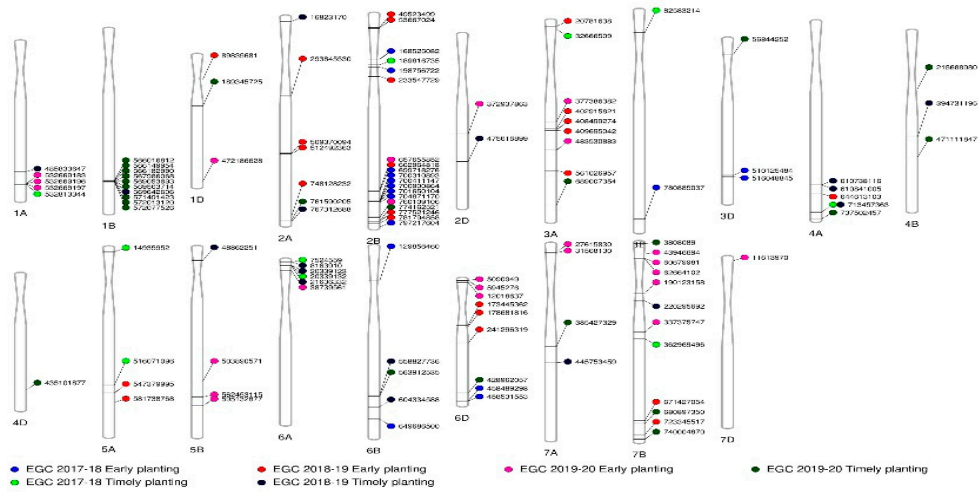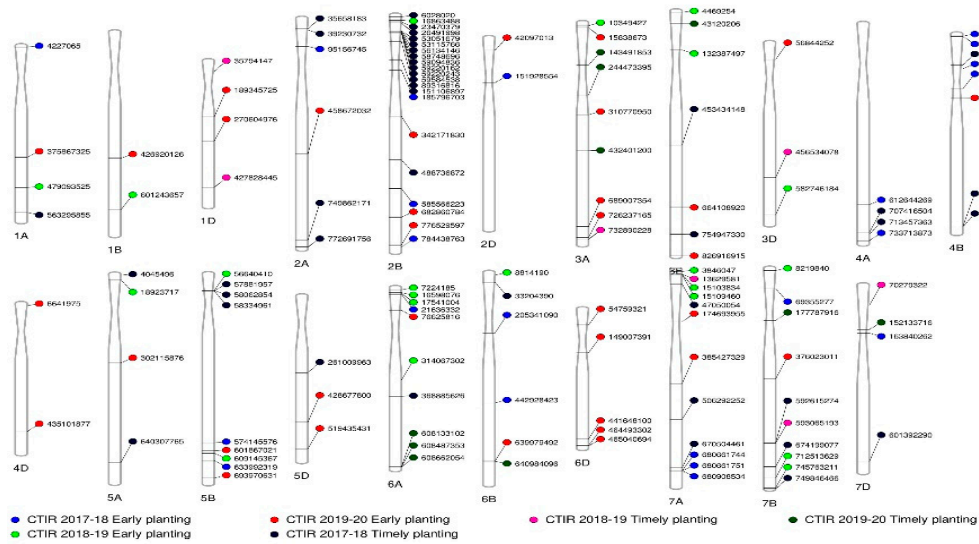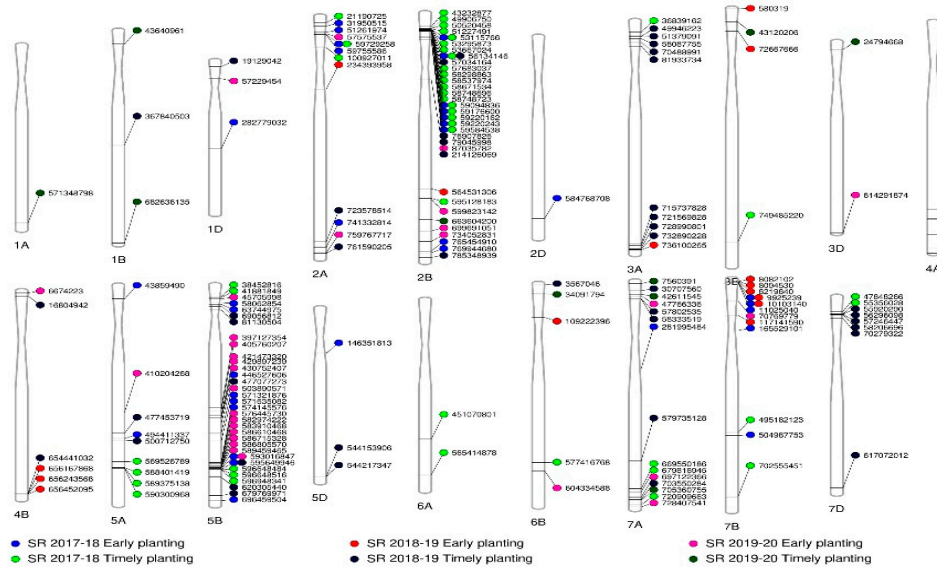

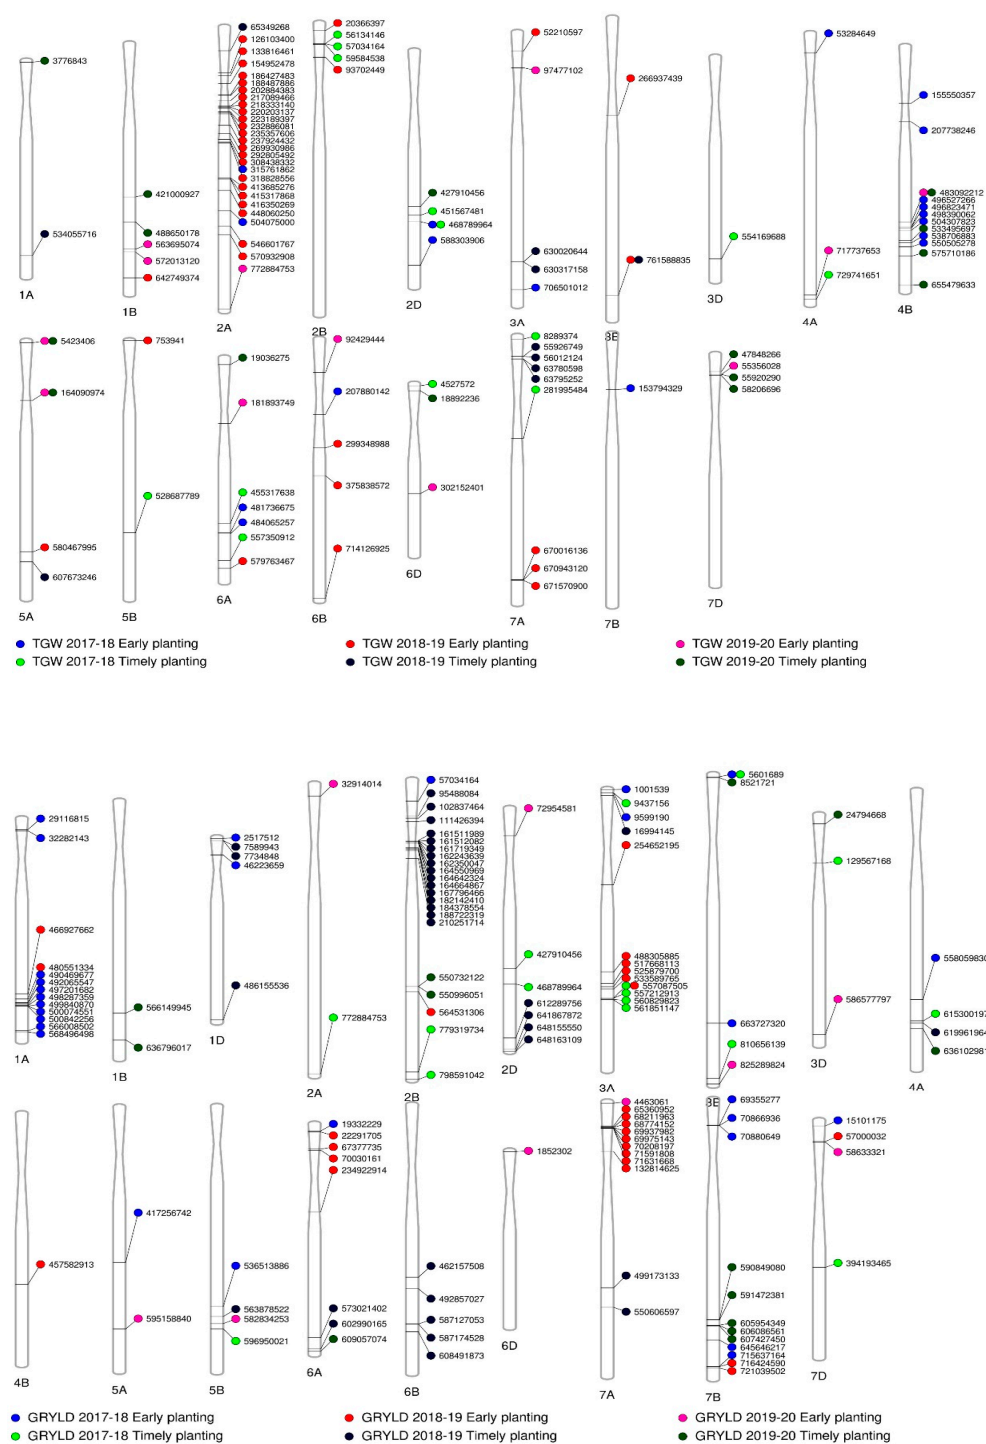

**c**

**Supplementary Figure 2:** Positions of the significant markers in the reference genome for; (a) phenological traits, (b) physiological traits, and (c) TGW and grain yield

**Supplementary Figure 3a:** Number of significant markers across the genome identified through GWAS

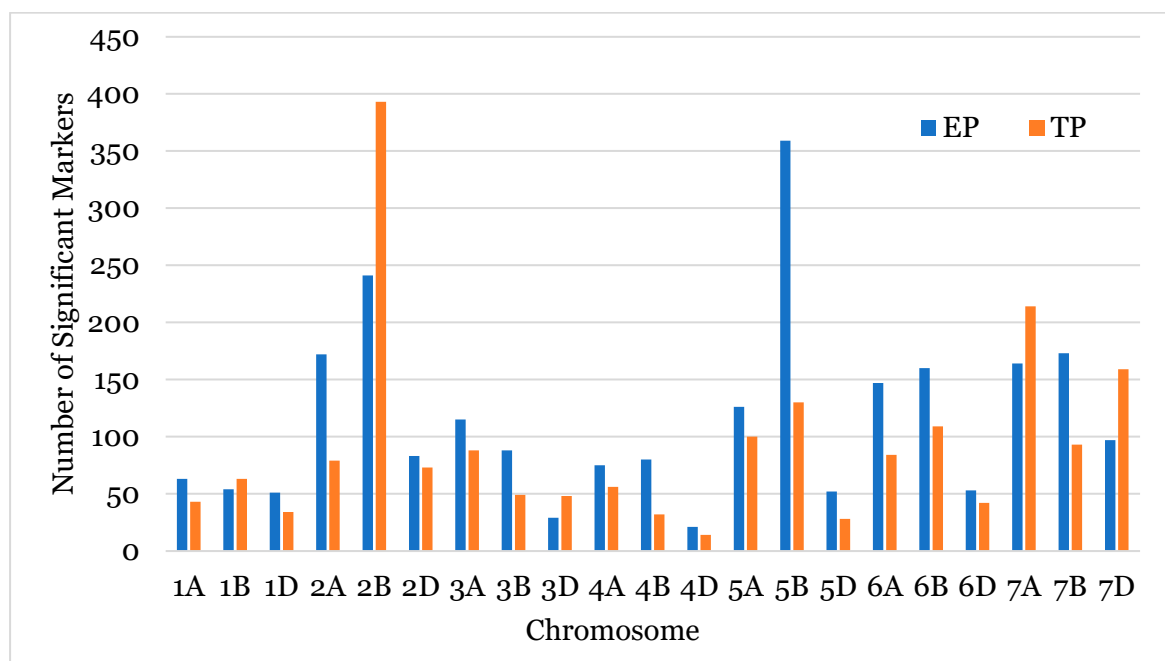

**Supplementary Figure 3b:** Genome wise QTL numbers showing their effect on planting times

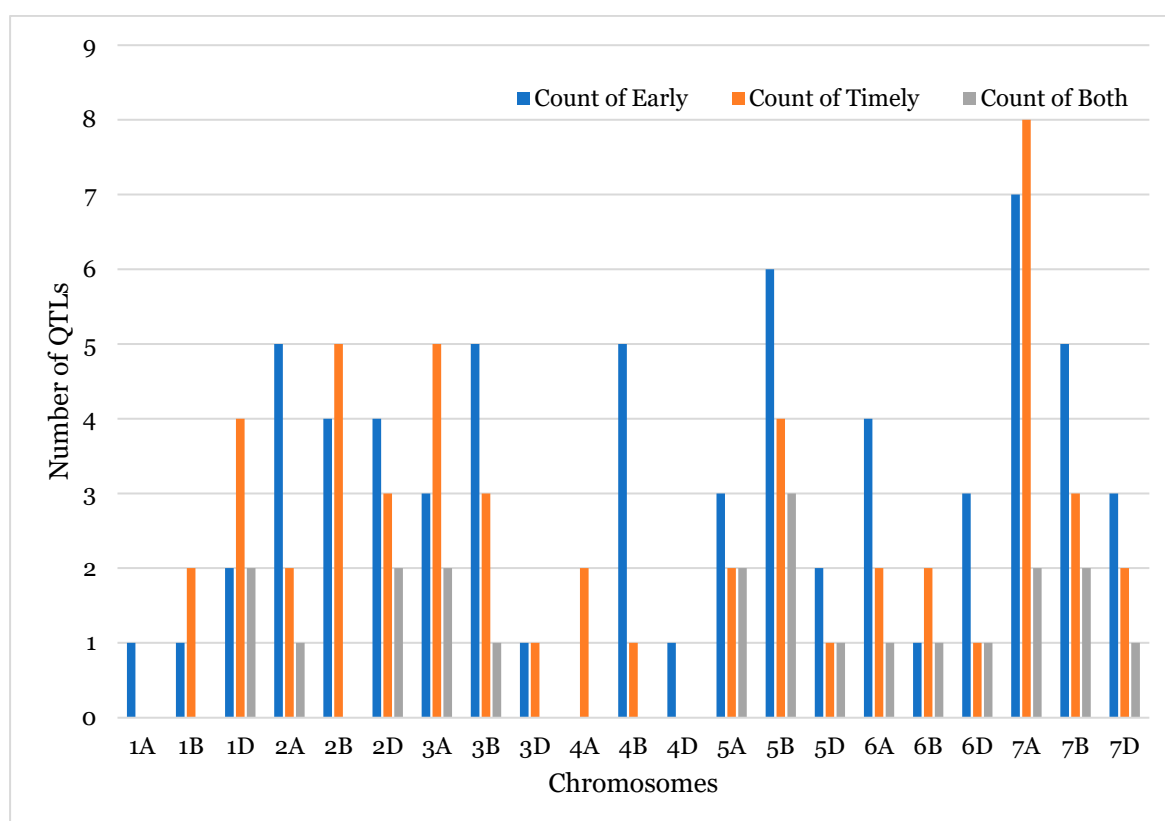

**Supplementary Figure 4:** Manhattan plots showing several markers are significantly associated with traits of interests studied in three consecutive seasons for early and timely planting

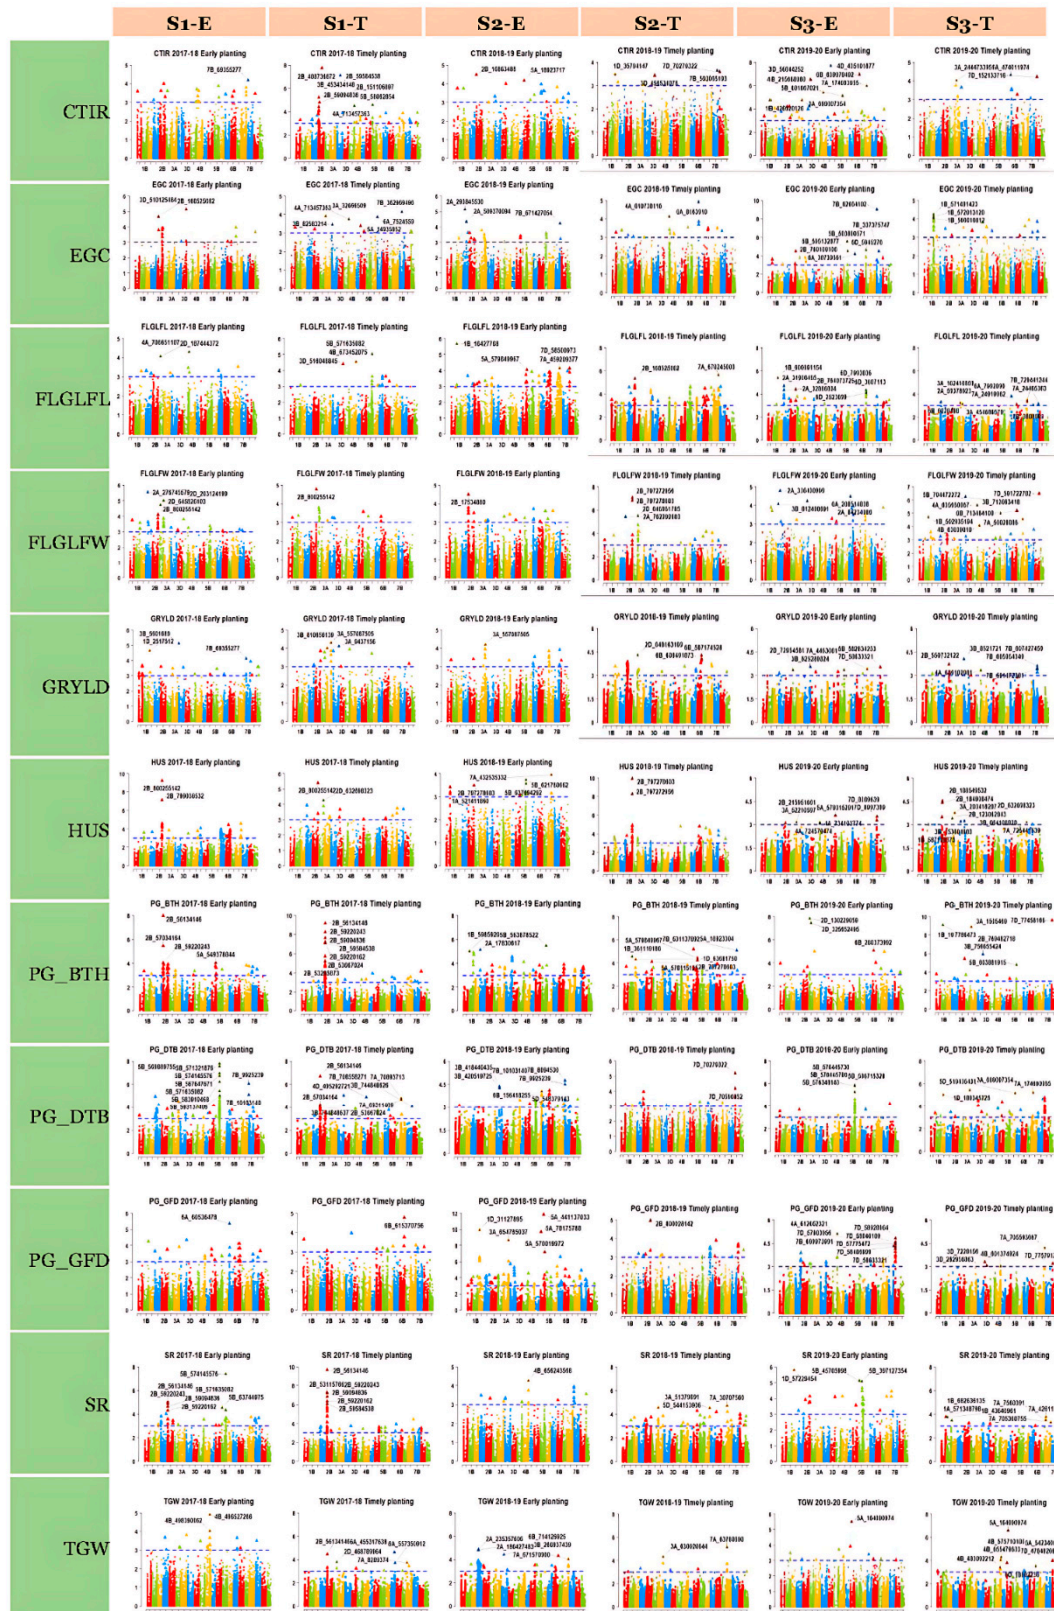

**Supplementary Figure 5:** Two decades (1998-2017) of historical temperature data revealed that there is minor high temperature in October which is the proposed early planting time for India

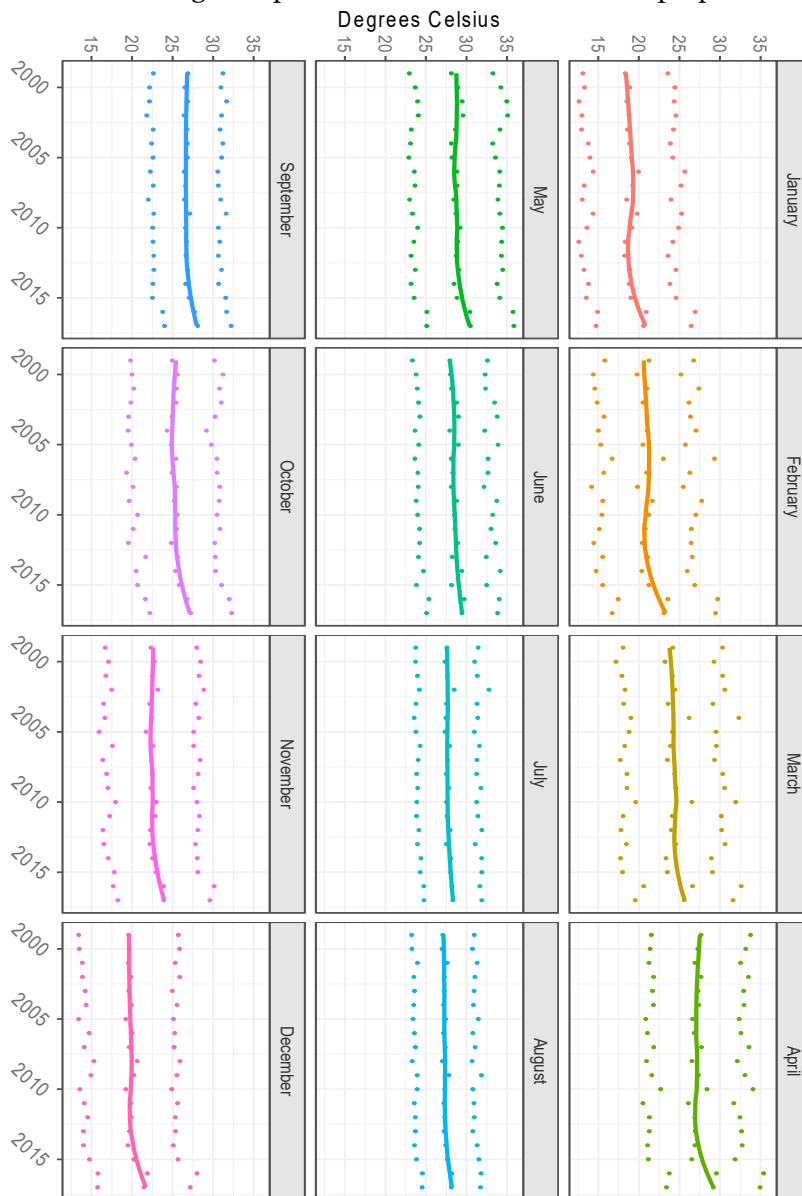



**Supplementary Figure 6:** Pearson correlation confidence Interval (Corr\_CI) of traits in early and timely planting. The estimated range of correlation at a confidence level of 95% showed that the trait's correlation had varied significantly in shifting planting time.

a) Phenological traits with plant stature

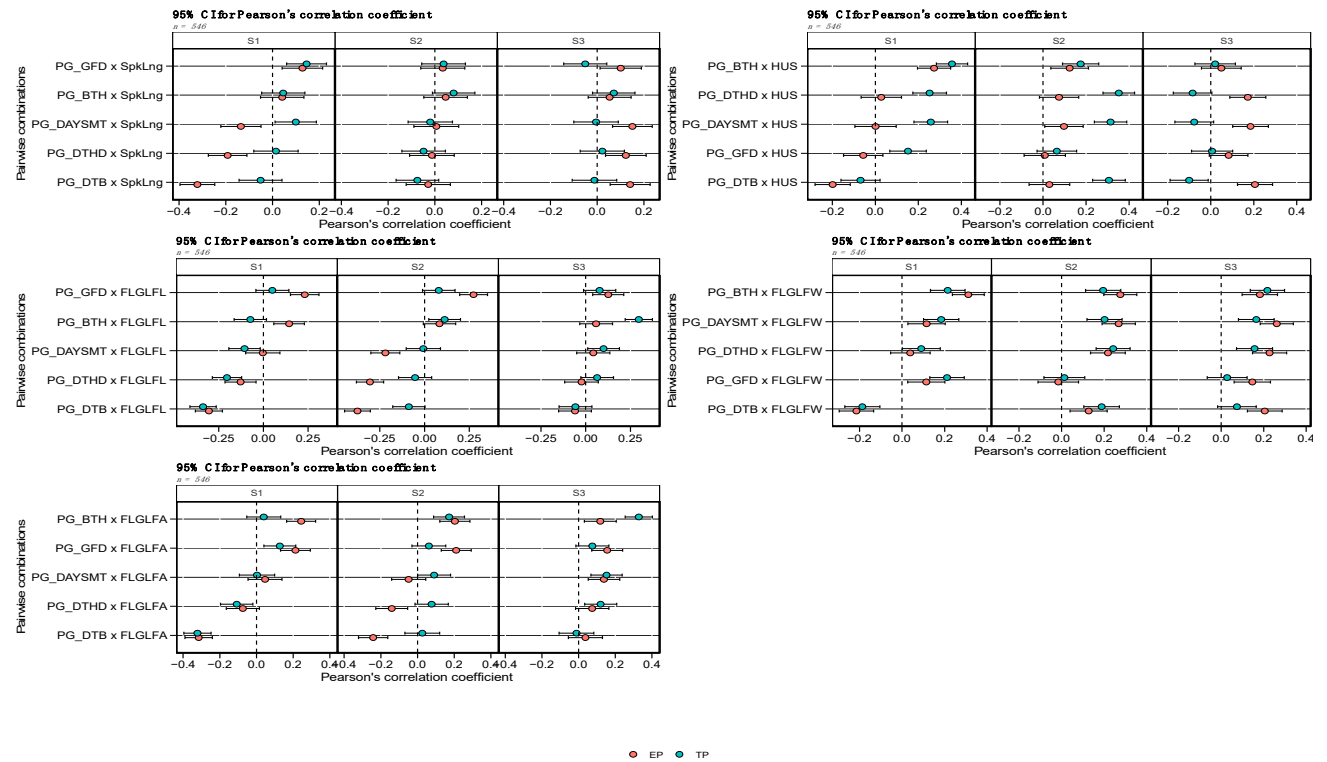

## b) Phenological traits with physiological traits

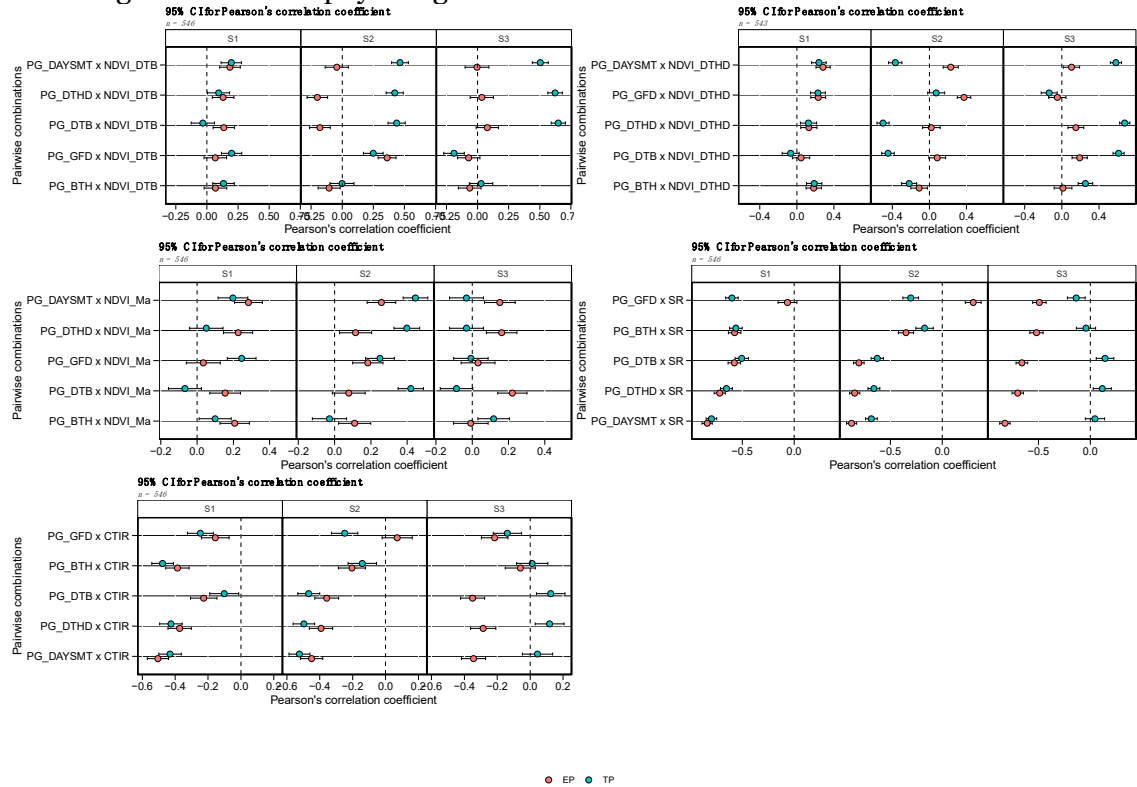

## c) Physiological traits with plant stature

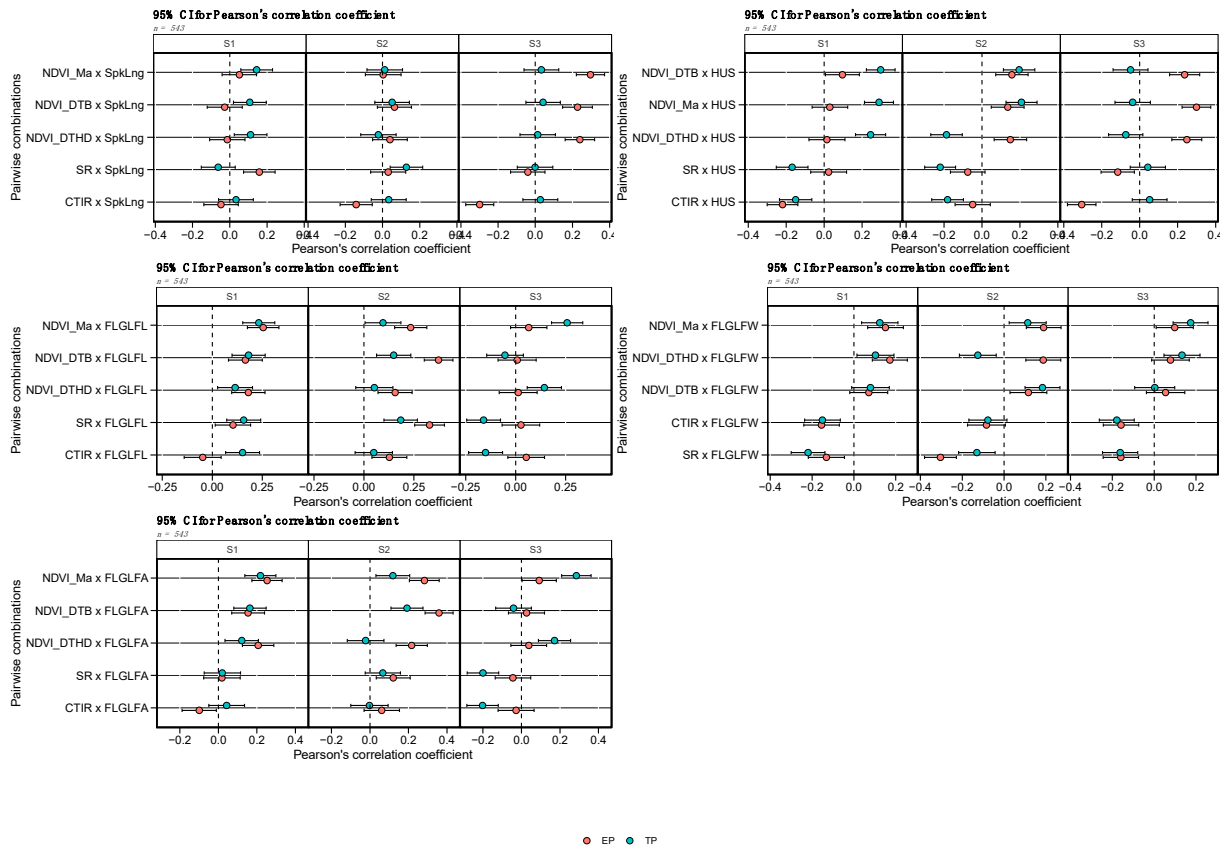

d) All the traits with TGW and grain yield

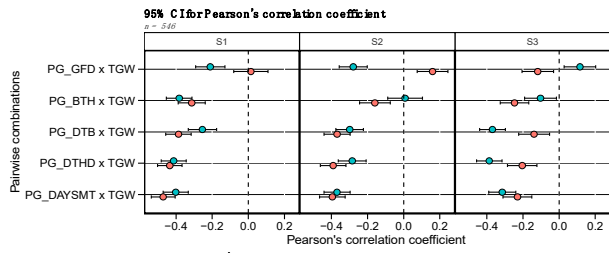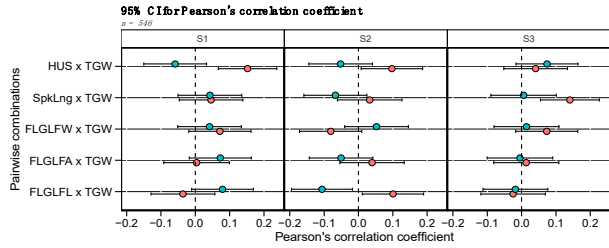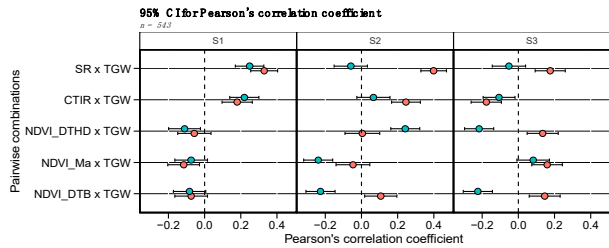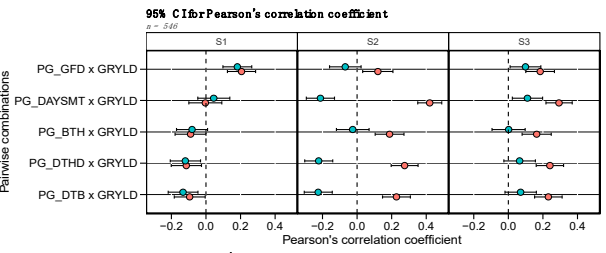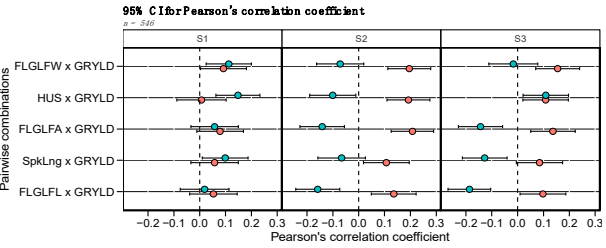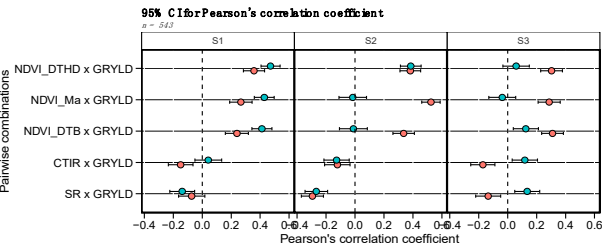

● EP ● TP
